# Supplementary material for: Alternative polyadenylation diversifies post‐transcriptional regulation by selective RNA–protein interactions
Source: PubMed Central journal article supplement (PMC4023391; doi:10.1002/msb.135068), 2014-02-25
Supplement: MSB-10-2-719-s04.pdf [file MSB-10-2-719-s04.pdf]

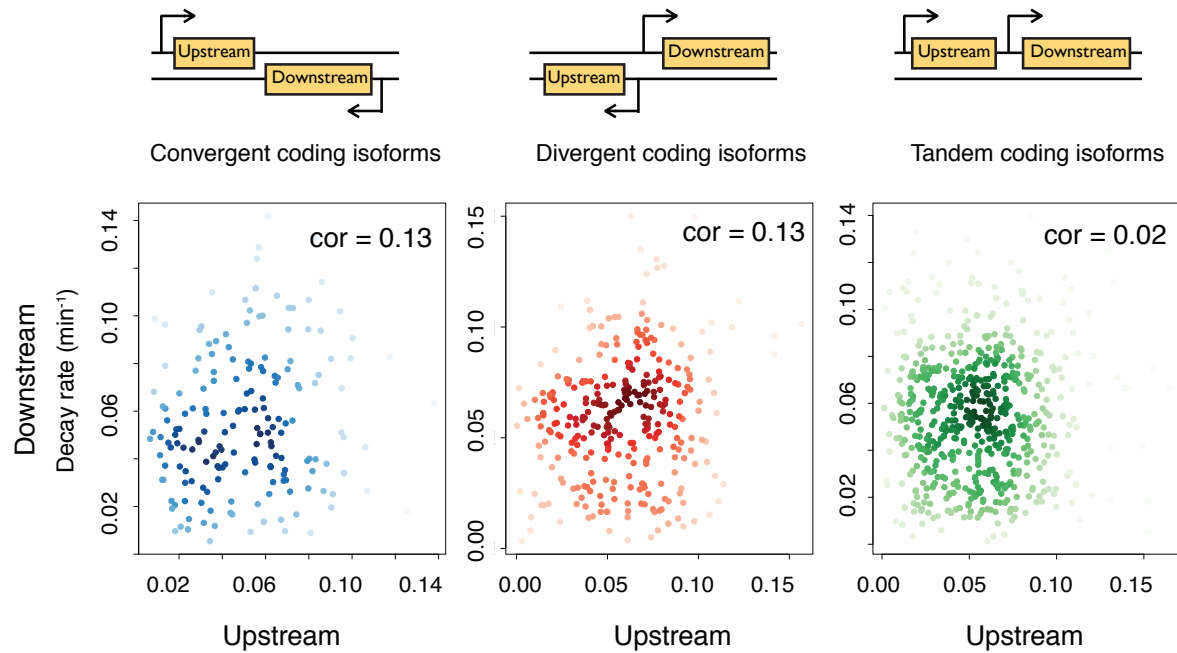

**Figure S4. Decay rates of neighboring gene pairs do not show distinguishable patterns with respect to their orientation.** Decay rates are shown for coding isoforms from 178 gene pairs in convergent orientation (blue), 409 gene pairs in divergent orientation (red), and 586 gene pairs in tandem orientation.
